# Supplementary material for: Simulation of the heat mitigation potential of unsealing measures in cities by parameterizing grass grid pavers for urban microclimate modelling with ENVI-met (V5)
Source: Copernicus journal article supplement (doi:10.5194/gmd-18-141-2025), 2025-01-14
Supplement: Supplementary file 1 [file gmd-18-141-2025-supplement.zip]

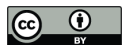

*Supplement of*

**Simulation of the heat mitigation potential of unsealing measures in cities by parameterizing grass grid pavers for urban microclimate modelling with ENVI-met (V5)**

**Nils Eingrüber et al.**

*Correspondence to:* Nils Eingrüber (nils.eingrueber@uni-koeln.de)

- gmd-18-141-2025-supplement-title-page.pdf
- Figure\_S1.svg
- Figure\_S2.svg
- Supplement.pdf

The copyright of individual parts of the supplement might differ from the article licence.
