# Supplementary material for: Simulation of the heat mitigation potential of unsealing measures in cities by parameterizing grass grid pavers for urban microclimate modelling with ENVI-met (V5)
Source: Copernicus journal article supplement (doi:10.5194/gmd-18-141-2025), 2025-01-14
Supplement: Supplementary file 2 [file gmd-18-141-2025-supplement.zip]

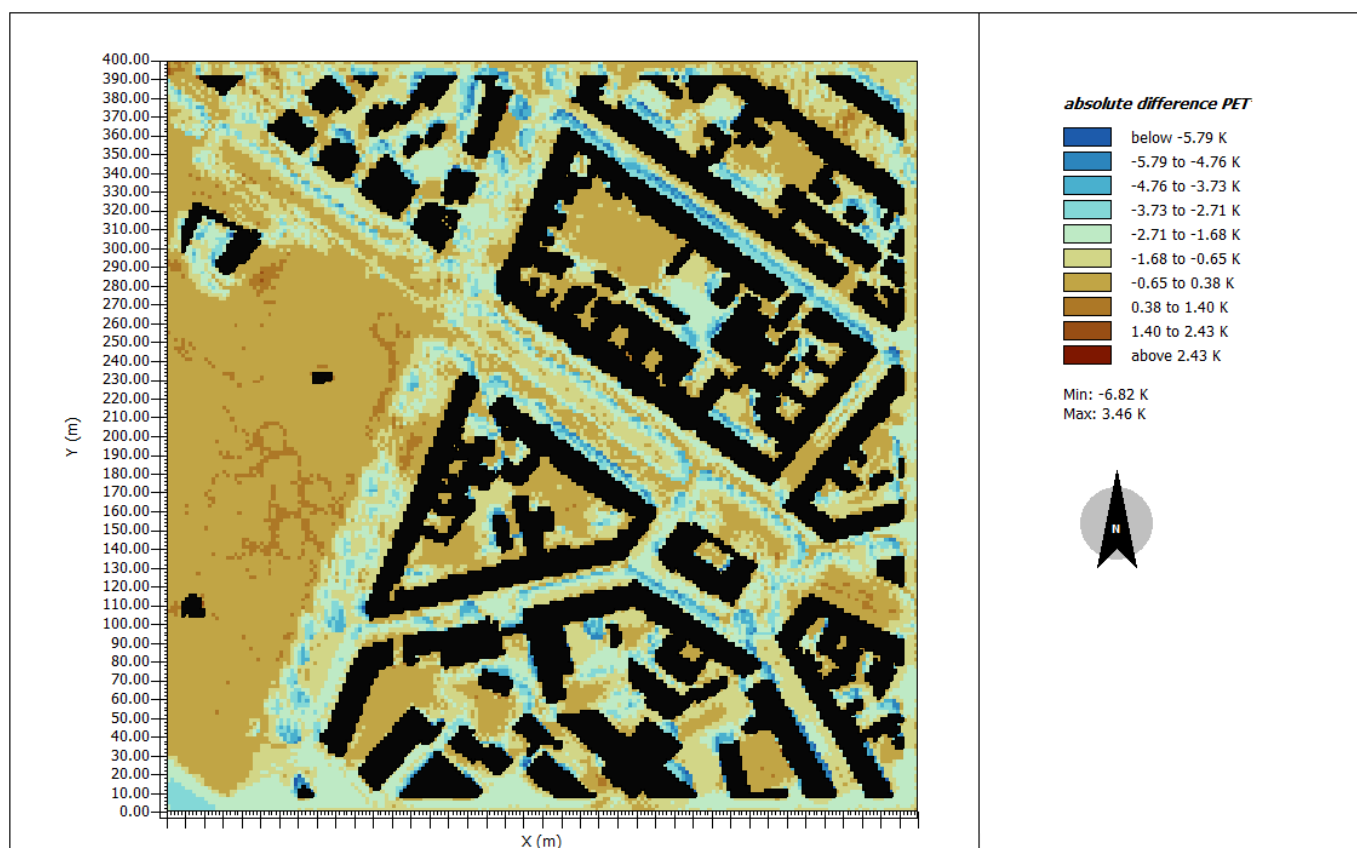

**Figure S1: Absolute difference in the biometeorological index Physiological Equivalent Temperature (PET) between the reference run S1 and the extreme scenario S2 in a height of 1 m above ground level.**

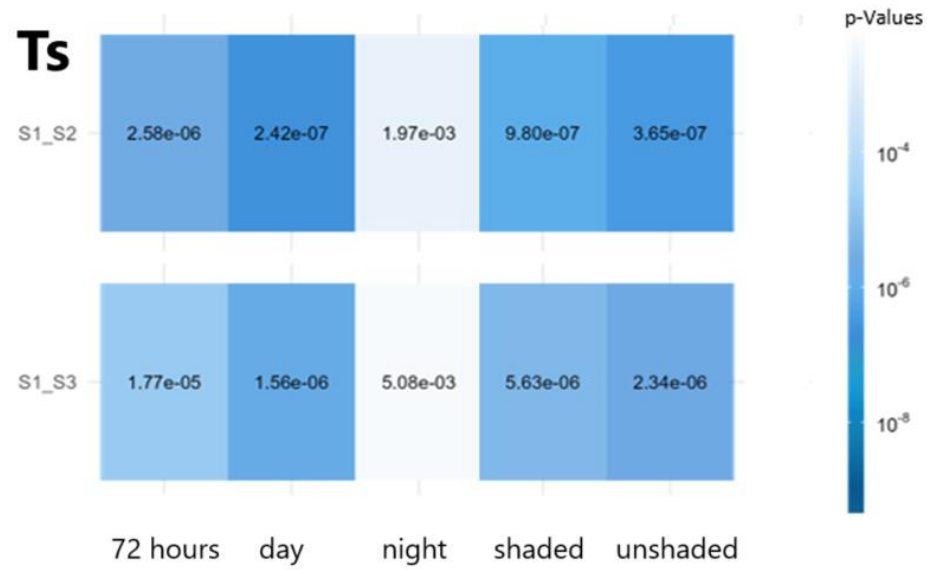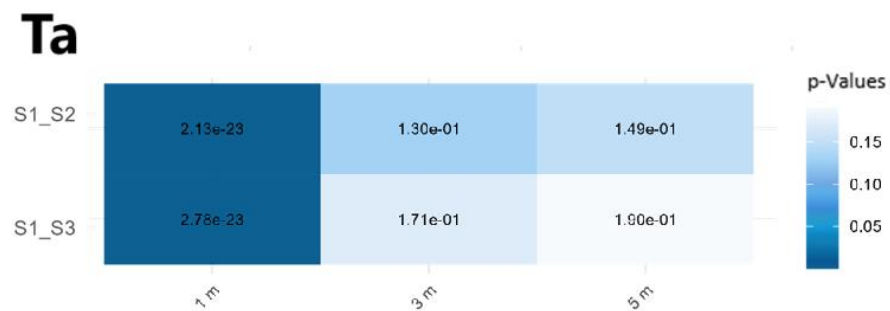

**Figure S2:** Table of significance test results (p-values of t-tests) for Ts divided into daytime, nighttime, shaded and unshaded, as well as for Ts divided into 1 m, 3 m, and 5 m height above ground level for the S2 and S3 in relation to S1 each.
